# Supplementary material for: Analysis of antiviral drug properties of thymidine kinase of herpes B virus using recombinant herpes simplex virus 1
Source: PubMed Central journal article supplement (PMC10783082; doi:10.1128/spectrum.03091-23), 2023-12-14

### Supplementary figure 1. Construction of transfer DNA

**containing BV TK.** DNA containing 50 nucleotides of the 3'-end of cytomegalovirus (CMV) promoter, the full length hBVTk gene and its poly A tail, and a 40-nucleotide sequence of UL51 flanked by *BamHI* restriction sites was amplified from pEP-KanS\_hBVTk by PCR (DNA fragment). The DNA fragment was inserted into the vector pAmp-9mScarlet-I DNA to obtain pAmp-9mScarlet-1\_hBVTk. DNA containing 50 nucleotides of the 3'-end of the CMV promoter, a *I-SceI* site, an ampicillin resistance cassette, the mScarlet-I gene, 50 nucleotides of the 3'-end of CMV promoter, hBVTk gene and its poly(A) region, and 50 nucleotides of the HSV-1 UL51 gene was amplified from pAmp-9mScarlet-1\_hBVTk (Transfer DNA).

DNA fragment

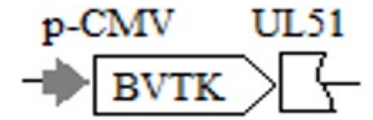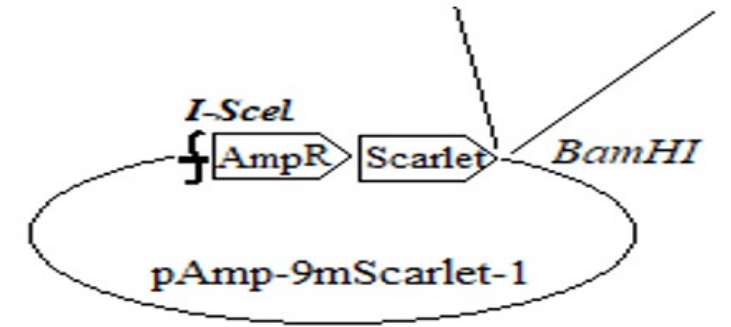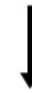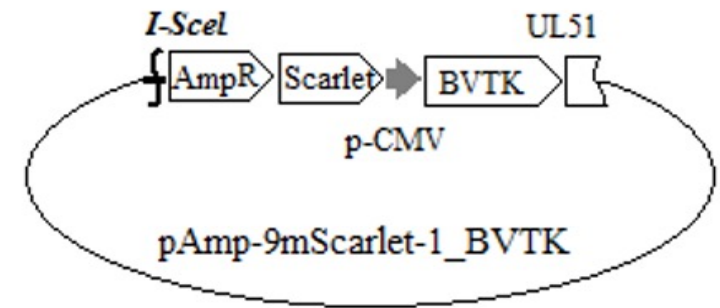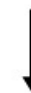

Transfer DNA

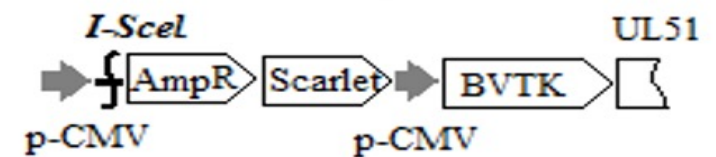

Supplement: spectrum.03091-23-s0001.pdf [file spectrum.03091-23-s0001.pdf]
